# Supplementary material
Source: PubMed Central journal article supplement (PMC5630474)
Supplement: mol-23-16_110_Zhou_Suppl.pdf [file mol-23-16_110_Zhou_Suppl.pdf]

# Tolerogenic Dendritic Cells Induced by BD750 Ameliorate Proinflammatory T cell Responses and Experimental Autoimmune Encephalitis in Mice

Yan Zhou,<sup>1,\*</sup> Xiao Leng,<sup>2,\*</sup> Hua Li,<sup>3</sup> Shuxia Yang,<sup>2</sup> Tai Yang,<sup>2</sup> Limei Li,<sup>2</sup> Ying Xiong,<sup>1</sup> Qiang Zou,<sup>2</sup> Yang Liu,<sup>2</sup> and Yantang Wang<sup>2</sup>

Online address: <http://www.molmed.org>

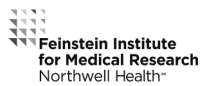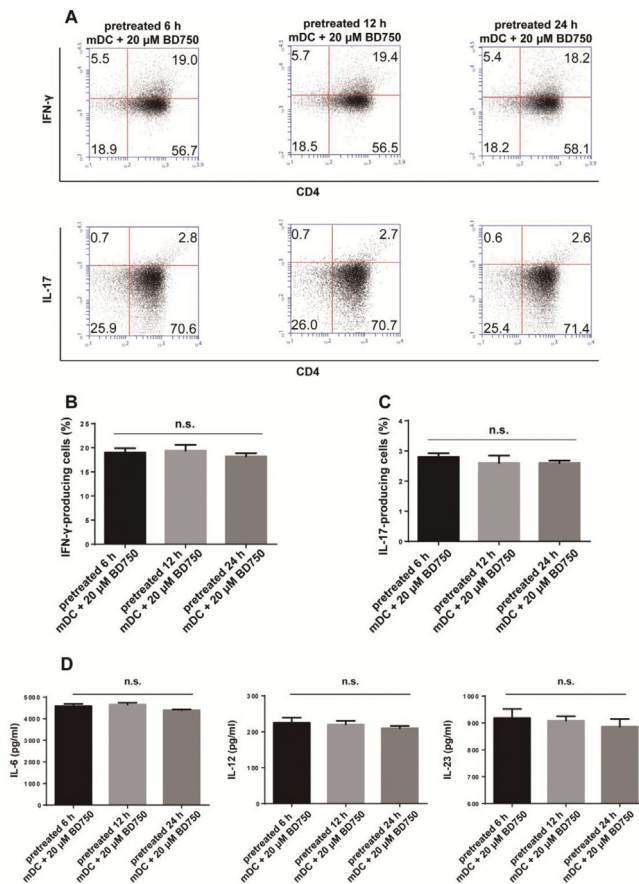

**Supplementary Figure S1.** The effect of pretreatment with BD750 for varying time periods to induce toIDC on Th1/Th17 cell differentiation in MLR. The purified immature DCs were treated with BD750 (20  $\mu$ M) for 6, 12 or 24 h and co-cultured with CD4 + T cells at a ratio of 1:20 for 72 h. The induced allogeneic Th1 and Th17 cells were determined by flow cytometry, and the levels of IL-6, IL-12 and IL-23 in the supernatants of cultured mDC were determined by ELISA. Data are representative FACS charts or expressed as the mean  $\pm$  SEM of each group of cells from three separate experiments. (A) Flow cytometry analysis of Th1 and Th17 cells. (B–C) Quantitative analysis of Th1 and Th17 cells. (D) Levels of cytokines.
